# Supplementary material
Source: MDPI journal article supplement (https://www.mdpi.com/2227-9040/10/6/213)
Supplement: s1 [file s1]

# Nitrogen Dioxide Optical Sensor Based on Redox-Active Tetrazolium/Pluronic Nanoparticles Embedded in PDMS Membranes

Esteban Araya-Hermosilla <sup>1,\*</sup>, Rodrigo Araya-Hermosilla <sup>2</sup>, Francesco Visentin <sup>3</sup>, Francesco Picchioni <sup>4</sup>, Andrea Pucci <sup>5,\*</sup> and Virgilio Mattoli <sup>1,\*</sup>

<sup>1</sup> Center for Materials Interfaces @SSSA Istituto Italiano di Tecnologia Viale Rinaldo Piaggio 34, 56025 Pontedera, Italy

<sup>2</sup> Programa Institucional de Fomento a la Investigación, Desarrollo e Innovación (PIDi), Universidad Tecnológica Metropolitana, Ignacio Valdivieso 2409, San Joaquín, Santiago 8940577, Chile; rodrigo.araya@utem.cl

<sup>3</sup> Bioinspired Soft Robotics Laboratory, Istituto Italiano di Tecnologia Viale Rinaldo Piaggio 34, 56025 Pontedera, Italy; francesco.visentin@iit.it

<sup>4</sup> Department of Chemical Engineering—Product Technology, University of Groningen, Nijenborgh 4, 9747 AG Groningen, The Netherlands; f.picchioni@rug.nl

<sup>5</sup> Department of Chemistry and Industrial Chemistry, University of Pisa, Via Moruzzi 13, 56124 Pisa, Italy

\* Correspondence: esteban.araya@iit.it (E.A.-H.) andrea.pucci@unipi.it (A.P.); virgilio.mattoli@iit.it (V.M.); Tel.: +39-050-2219-270 (A.P.)

**Table S1.** Dynamic light scattering characterization of TF nanoparticles stabilized with Pluronic F 127.

| ASC concentration | TTC concentration | Pluronic F127 concentration (M) | Size  | Error | Zeta potential | Error  | PDI   | Error |
|-------------------|-------------------|---------------------------------|-------|-------|----------------|--------|-------|-------|
| 0.01              | 0.01              | 0.00005                         | 114.2 | 1.604 | -0.5           | 0.439  | 0.346 | 0.046 |
| 0.01              | 0.01              | 0.00006                         | 118.7 | 2.084 | 0.316          | 0.472  | 0.308 | 0.055 |
| 0.01              | 0.01              | 0.00007                         | 120.1 | 3.213 | 1.07           | 0.198  | 0.308 | 0.028 |
| 0.01              | 0.01              | 0.00008                         | 130.6 | 2.427 | 0.427          | 0.244  | 0.266 | 0.016 |
| 0.01              | 0.01              | 0.00009                         | 132.2 | 0.2   | 0.59           | 0.565  | 0.268 | 0.014 |
| 0.01              | 0.01              | 0.0001                          | 143.7 | 0.611 | 0.686          | 0.235  | 0.238 | 0.008 |
| 0.01              | 0.01              | 0.0002                          | 193.5 | 5.468 | -0.782         | 0.0636 | 0.23  | 0.027 |
| 0.01              | 0.01              | 0.0003                          | 202.0 | 1.25  | 1.02           | 0.348  | 0.231 | 0.008 |
| 0.01              | 0.01              | 0.0004                          | 214.6 | 1.65  | 1.05           | 0.21   | 0.254 | 0.053 |
| 0.01              | 0.01              | 0.0005                          | 270.1 | 9.445 | 0.597          | 0.13   | 0.227 | 0.06  |
| 0.01              | 0.01              | 0.001                           | 305.7 | 16.44 | 0.451          | 0.162  | 0.284 | 0.073 |

**Table S2.** Dynamic light scattering characterization of TF nanoparticles stabilized with pluronic F 127 after 7 days.

| ASC concentration | TTC concentration | Pluronic F127 concentration (M) | Size  | Error  | Zeta potential | Error  | PDI   | Error |
|-------------------|-------------------|---------------------------------|-------|--------|----------------|--------|-------|-------|
| 0.01              | 0.01              | 0.00005                         | 92.94 | 1.776  | 0.0907         | 0.303  | 0.475 | 0.032 |
| 0.01              | 0.01              | 0.00006                         | 107.7 | 1.701  | 0.0831         | 0.0659 | 0.442 | 0.024 |
| 0.01              | 0.01              | 0.00007                         | 99.77 | 0.4772 | 0.435          | 0.277  | 0.477 | 0.009 |
| 0.01              | 0.01              | 0.00008                         | 103.5 | 0.1528 | 0.115          | 0.23   | 0.47  | 0.011 |
| 0.01              | 0.01              | 0.00009                         | 91.44 | 1.315  | 0.151          | 0.0353 | 0.487 | 0.003 |
| 0.01              | 0.01              | 0.0001                          | 118.8 | 2.427  | 0.585          | 0.308  | 0.362 | 0.04  |
| 0.01              | 0.01              | 0.0002                          | 90.55 | 0.6749 | 1.2            | 0.0473 | 0.529 | 0.035 |

|      |      |        |       |       |      |        |       |       |
|------|------|--------|-------|-------|------|--------|-------|-------|
| 0.01 | 0.01 | 0.0003 | 113.1 | 2.456 | 1.02 | 0.0765 | 0.442 | 0.021 |
| 0.01 | 0.01 | 0.0004 | 177.1 | 9.056 | 1.05 | 0.0814 | 0.432 | 0.015 |
| 0.01 | 0.01 | 0.0005 | 225   | 26.13 | 1.23 | 0.168  | 0.376 | 0.013 |
| 0.01 | 0.01 | 0.001  | 268.1 | 11.45 | 1.04 | 0.22   | 0.407 | 0.067 |

**Table S3.** Dynamic light scattering characterization of TF nanoparticles stabilized with pluronic F 127 after 14 days.

| ASC concentration | TTC concentration | Pluronic F127 concentration (M) | Size  | Error  | Zeta potential | Error  | PDI   | Error |
|-------------------|-------------------|---------------------------------|-------|--------|----------------|--------|-------|-------|
| 0.01              | 0.01              | 0.00005                         | 90.36 | 1.665  | −0.621         | 0.096  | 0.512 | 0.031 |
| 0.01              | 0.01              | 0.00006                         | 98.47 | 1.107  | −1.22          | 0.362  | 0.492 | 0.011 |
| 0.01              | 0.01              | 0.00007                         | 93.15 | 1.395  | −0.577         | 0.198  | 0.48  | 0.021 |
| 0.01              | 0.01              | 0.00008                         | 103.1 | 0.781  | −1.11          | 0.307  | 0.487 | 0.005 |
| 0.01              | 0.01              | 0.00009                         | 83.38 | 1.049  | −1.16          | 0.213  | 0.533 | 0.008 |
| 0.01              | 0.01              | 0.0001                          | 118.5 | 1.825  | −0.923         | 0.196  | 0.393 | 0.049 |
| 0.01              | 0.01              | 0.0002                          | 99.44 | 1.093  | 0.218          | 0.128  | 0.466 | 0.026 |
| 0.01              | 0.01              | 0.0003                          | 88.09 | 0.8774 | −0.352         | 0.251  | 0.454 | 0.01  |
| 0.01              | 0.01              | 0.0004                          | 87.79 | 0.9455 | 0.346          | 0.0541 | 0.404 | 0.023 |
| 0.01              | 0.01              | 0.0005                          | 131.4 | 1.323  | 0.864          | 0.151  | 0.399 | 0.046 |
| 0.01              | 0.01              | 0.001                           | 275.5 | 6.087  | 1.08           | 0.292  | 0.424 | 0.024 |

**Table S4.** Dynamic light scattering characterization of TF nanoparticles stabilized with pluronic F 127 after 22 days.

| ASC concentration | TTC concentration | Pluronic F127 concentration (M) | Size  | Error  | Zeta potential | Error  | PDI   | Error |
|-------------------|-------------------|---------------------------------|-------|--------|----------------|--------|-------|-------|
| 0.01              | 0.01              | 0.00005                         | 81.15 | 0.6194 | −2.21          | 0.455  | 0.533 | 0.007 |
| 0.01              | 0.01              | 0.00006                         | 95.32 | 0.1097 | −3.25          | 0.25   | 0.503 | 0.01  |
| 0.01              | 0.01              | 0.00007                         | 90.96 | 0.5256 | −1.02          | 0.466  | 0.498 | 0.01  |
| 0.01              | 0.01              | 0.00008                         | 99.12 | 0.4674 | −1.96          | 0.27   | 0.486 | 0.016 |
| 0.01              | 0.01              | 0.00009                         | 75.18 | 0.27   | −1.95          | 0.305  | 0.509 | 0.01  |
| 0.01              | 0.01              | 0.0001                          | 112.5 | 2.261  | −3.17          | 0.466  | 0.441 | 0.037 |
| 0.01              | 0.01              | 0.0002                          | 99.3  | 0.926  | −0.699         | 0.0811 | 0.495 | 0.001 |
| 0.01              | 0.01              | 0.0003                          | 89.78 | 0.2223 | −0.733         | 0.143  | 0.463 | 0.007 |
| 0.01              | 0.01              | 0.0004                          | 99.65 | 1.451  | −0.472         | 0.305  | 0.433 | 0.009 |
| 0.01              | 0.01              | 0.0005                          | 139.5 | 0.8737 | −0.205         | 0.402  | 0.41  | 0.015 |
| 0.01              | 0.01              | 0.001                           | 264.5 | 2.458  | −0.0811        | 0.227  | 0.478 | 0.016 |

**Table S5.** Dynamic light scattering characterization of TF nanoparticles stabilized with pluronic F 127 after 28 days.

| ASC concentration | TTC concentration | Pluronic F127 concentration (M) | Size  | Error | Zeta potential | Error | PDI   | Error |
|-------------------|-------------------|---------------------------------|-------|-------|----------------|-------|-------|-------|
| 0.01              | 0.01              | 0.00005                         | 73.8  | 4.153 | −2.76          | 0.651 | 0.459 | 0.058 |
| 0.01              | 0.01              | 0.00006                         | 88.19 | 2.513 | −3.46          | 0.806 | 0.462 | 0.035 |
| 0.01              | 0.01              | 0.00007                         | 82.21 | 2.997 | −1.77          | 0.211 | 0.475 | 0.058 |
| 0.01              | 0.01              | 0.00008                         | 87.22 | 3.198 | −2.53          | 0.73  | 0.468 | 0.016 |
| 0.01              | 0.01              | 0.00009                         | 70.32 | 2.929 | −2.33          | 0.163 | 0.482 | 0.024 |
| 0.01              | 0.01              | 0.0001                          | 96.04 | 3.646 | −3.4           | 0.143 | 0.462 | 0.02  |
| 0.01              | 0.01              | 0.0002                          | 85.33 | 5.275 | −1.77          | 0.254 | 0.473 | 0.012 |
| 0.01              | 0.01              | 0.0003                          | 83.75 | 2.289 | −1.54          | 0.344 | 0.429 | 0.003 |
| 0.01              | 0.01              | 0.0004                          | 95.15 | 5.399 | −0.963         | 0.344 | 0.39  | 0.089 |
| 0.01              | 0.01              | 0.0005                          | 139   | 12.62 | −0.265         | 0.651 | 0.31  | 0.137 |
| 0.01              | 0.01              | 0.001                           | 230.9 | 25.32 | −0.738         | 0.364 | 0.214 | 0.157 |

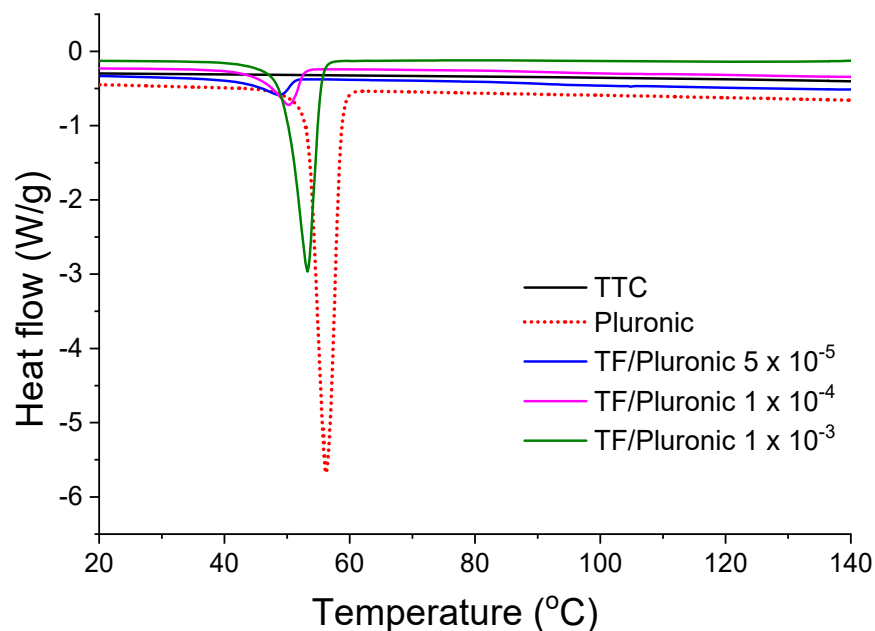

**Figure S1.** DSC analysis of TTC, Pluronic, and the dehydrated colloids form by TF and Pluronic at the concentration of  $5 \times 10^{-5}$  M,  $10^{-4}$  M, and  $10^{-3}$  M.

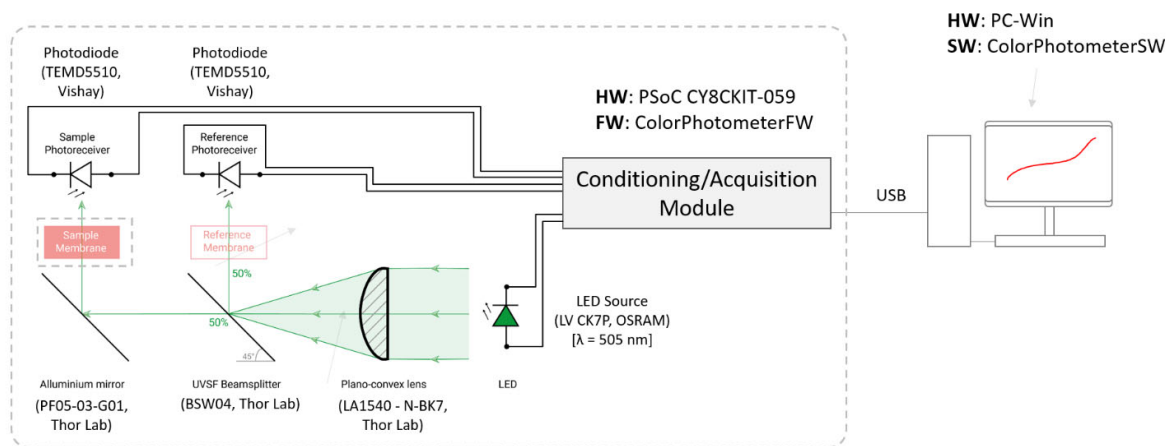

Dedicated case/enclosure was built by 3D printing (stl files available: "Case\_bottom.STL"; "Case\_center.STL"; "Case\_top.STL" in "CaseColorPhotometer.zip")

**Figure S2.** Overview of the LED/photodiode-based colorimetric optical devices. All the material to reproduce the system (including hardware, firmware, and software) is available as an open-source resource at <https://doi.org/10.5281/zenodo.5825639>.

USB Connection to PC  
(Power and Data)

PSoC CY8CKIT-059

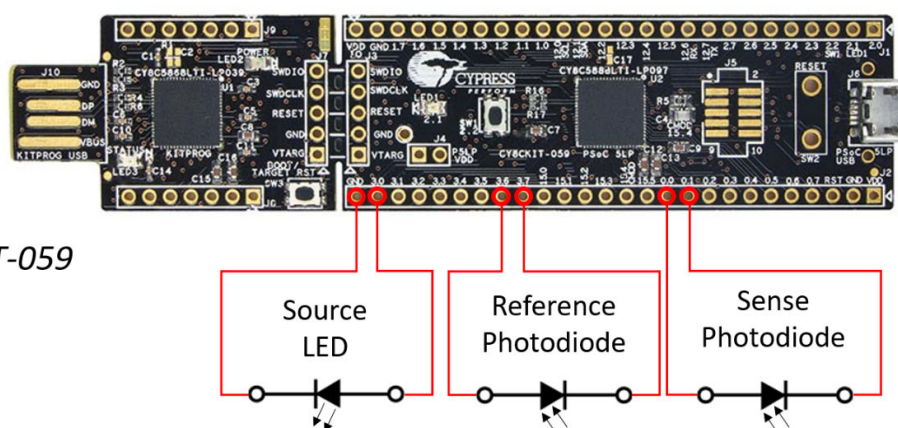

**Figure S3.** Electronic connections for the conditioning/acquisition module based on a low cost PSoC CY8CKIT-059 development board. The firmware is available as an open-source resource at <https://doi.org/10.5281/zenodo.5825639>.

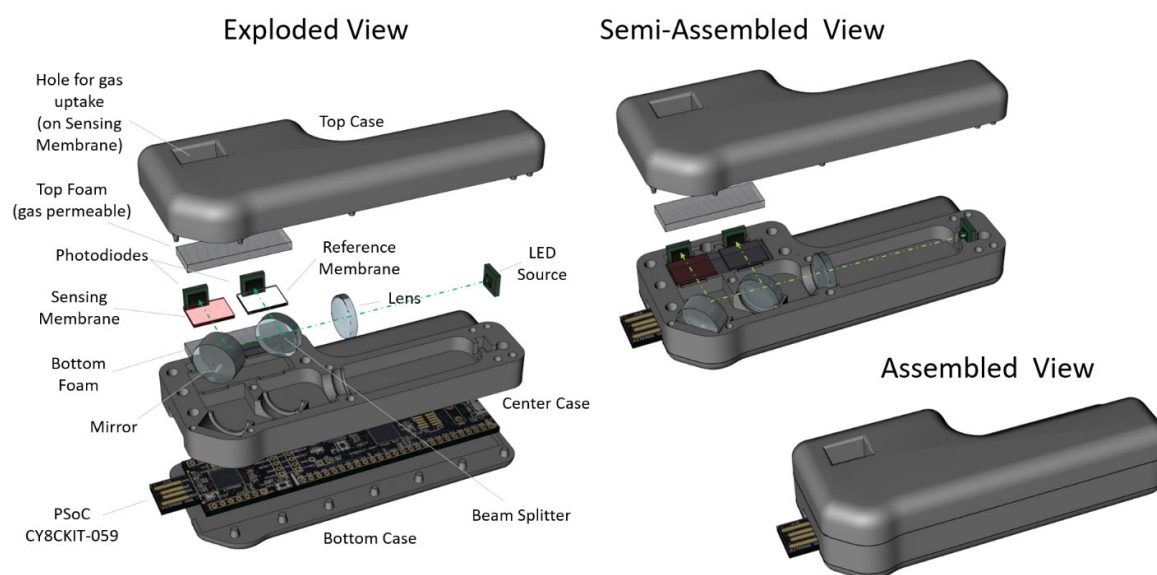

**Figure S4.** Overview of the colorimetric optical devices case/enclosure hardware: exploded (**left**) and related assembly (**right**).

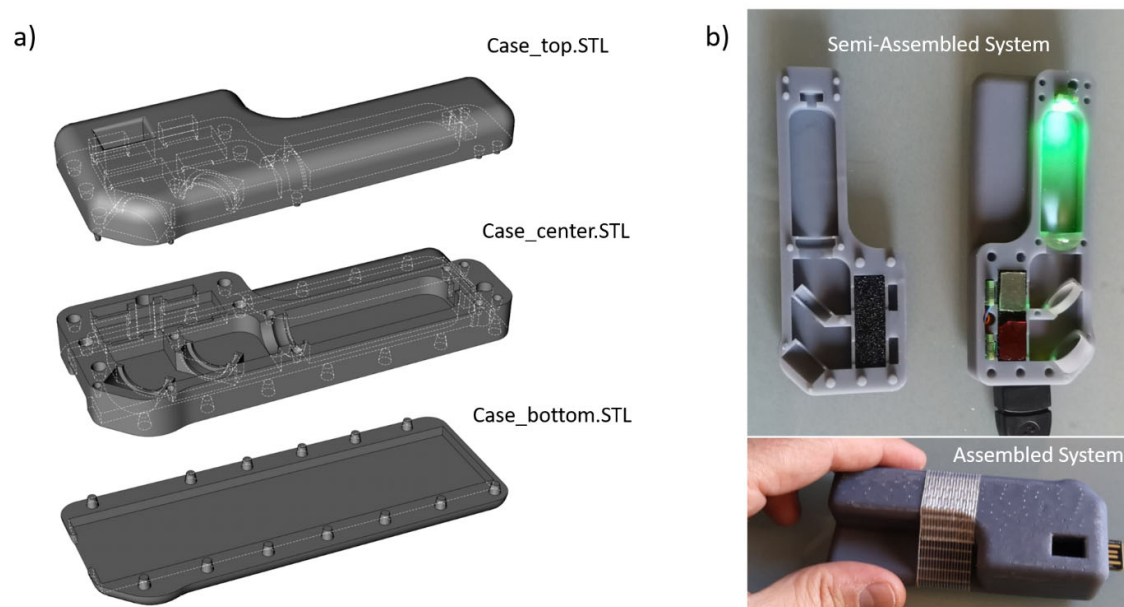

**Figure S5.** a) 3D CAD files of device case/enclosure hardware: stl files are available as an open-source resource at <https://doi.org/10.5281/zenodo.5825639>. b) Pictures of the assembled colorimetric optical devices.

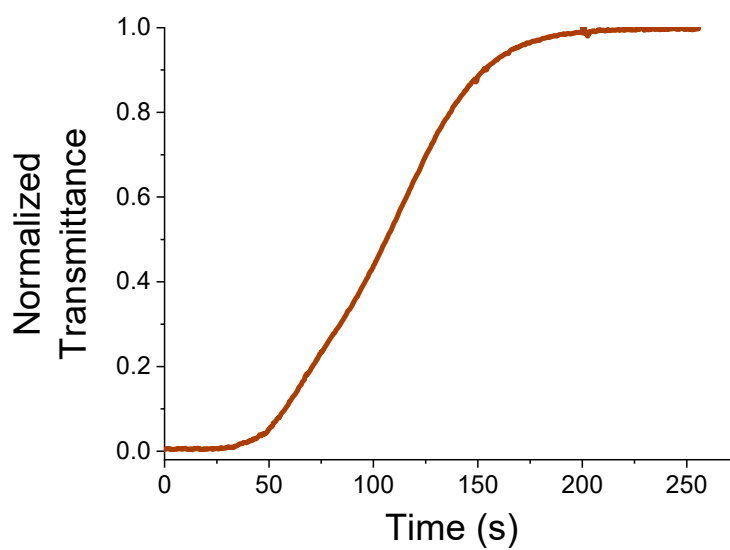

**Figure S6.** Preliminary NO<sub>2</sub> detection test with colorimetric optical devices in presence of an NO<sub>2</sub> excess.
